# Supplementary material for: Assessing and assuring interoperability of a genomics file format
Source: PubMed Central journal article supplement (PMC9237710; doi:10.1093/bioinformatics/btac327), 2022-05-16
Supplement: btac327_supplementary_data.pdf [file btac327_supplementary_data.pdf]

# Supplementary tables for “Assessing and assuring interoperability of a genomics file format”

Yi Nian Niu (0000-0002-5691-8238)<sup>1</sup>, Eric G. Roberts (0000-0001-5398-358X)<sup>1</sup>,  
Danielle Denisko (0000-0002-8544-0026)<sup>1,2</sup>, and  
Michael M. Hoffman (0000-0002-4517-1562)<sup>1,2,3,4,\*</sup>

<sup>1</sup>Princess Margaret Cancer Centre, University Health Network, Toronto, ON, Canada

<sup>2</sup>Department of Medical Biophysics, University of Toronto, Toronto, ON, Canada

<sup>3</sup>Department of Computer Science, University of Toronto, Toronto, ON, Canada

<sup>4</sup>Vector Institute, Toronto, ON, Canada

\*Corresponding author

March 28, 2022

| Tools passing | Test case                       |
|---------------|---------------------------------|
| 37            | other-fully_space_delimited.bed |
| 37            | other-not_tab_delimited.bed     |
| 52            | other-comment_start.bed         |
| 57            | other-space_before_tab.bed      |
| 58            | other-space_after_tab.bed       |
| 58            | other-space_between_lines.bed   |
| 60            | other-multiple_comments.bed     |
| 61            | other-comment_end.bed           |
| 62            | other-comment_middle.bed        |
| 67            | 03-start_eq_end.bed             |
| 71            | 01-known_scaffolds.bed          |
| 71            | 01-unknown_scaffolds.bed        |
| 78            | 02-leading_zeros_start.bed      |
| 79            | 03-duplicate_rows.bed           |
| 79            | 03-overlapping_intervals.bed    |
| 79            | 03-zero_chromStart.bed          |
| 79            | 03-no_gap_startend.bed          |
| 79            | 03-standard_chrom.bed           |

**Supplementary Table 1: Number of tools that passed each of 18 expected success BED3 test cases.** We tested 99 tools. The leading number in the test case name describes the Browser Extensible Data (BED) field that the test focuses on. “Other” means the test focuses on the structure of the file, rather than a particular field.

| <b>Test case name</b>                                                                                     | <b>Description</b>                                                        |
|-----------------------------------------------------------------------------------------------------------|---------------------------------------------------------------------------|
| <b>Field 1: chrom:</b> the name of the chromosome where the feature is present.                           |                                                                           |
| 01-known_scaffolds                                                                                        | Scaffolds with a known chromosome such as “chr19_GL383573v1_alt”          |
| 01-unknown_scaffolds                                                                                      | Scaffolds with an unknown chromosome such as “chrUn_KI270442v1”           |
| <b>Field 2: chromStart:</b> start position of the feature on the chromosome.                              |                                                                           |
| 02-leading_zeros_start                                                                                    | chromStart left-padded with “0”                                           |
| <b>Field 3: chromEnd:</b> end position of the feature on the chromosome.                                  |                                                                           |
| 03-duplicate_rows                                                                                         | Two features have the exact same (chrom, chromStart, chromEnd)            |
| 03-no_gap_startend                                                                                        | No gap between chromEnd of one feature and chromStart of the next feature |
| 03-overlapping_intervals                                                                                  | All features’ intervals overlap each other                                |
| 03-standard_chrom                                                                                         | A BED file without edge cases                                             |
| 03-start_eq_end                                                                                           | chromStart equals chromEnd                                                |
| 03-zero_chromStart                                                                                        | chromStart is “0”                                                         |
| <b>Field 4: name:</b> string that describes the feature.                                                  |                                                                           |
| 04-name_dot                                                                                               | All features have name “.”                                                |
| 04-repeated_name                                                                                          | Multiple features have the same non-dot name                              |
| 04-special_character_name                                                                                 | Name contains non-alphanumeric ASCII characters                           |
| <b>Field 5: score:</b> integer between 0 and 1000, inclusive.                                             |                                                                           |
| 05-edge_score                                                                                             | Score is “0” or “1000”                                                    |
| 05-leading_zeros_score                                                                                    | Score left-padded with “0”                                                |
| 05-zero_scores                                                                                            | Score is “0”                                                              |
| <b>Field 6: strand:</b> strand that the feature appears on.                                               |                                                                           |
| 06-dot_strand                                                                                             | Strand is “.”                                                             |
| 06-mix_strand                                                                                             | Strand selected from one of “+”, “-”, or “.”                              |
| <b>Field 7: thickStart:</b> start position at which the feature is visualized with thicker display.       |                                                                           |
| 07-leading_zeros_thickStart                                                                               | thickStart left-padded with “0”                                           |
| <b>Field 8: thickEnd:</b> end position at which the feature is visualized with thicker display.           |                                                                           |
| 08-all_thick                                                                                              | thickStart equal to chromStart; thickEnd equal to chromEnd                |
| 08-no_thick_part                                                                                          | thickStart equals to thickEnd equal to chromStart                         |
| <b>Field 9: itemRgb:</b> A triplet of integers that determines the color of this feature when visualized. |                                                                           |
| 09-leading_zeros_colors                                                                                   | Color left-padded with “0”                                                |
| 09-many_colors                                                                                            | Multiple colors in the file                                               |
| 09-zero_rgb                                                                                               | Color is “0”                                                              |

**Supplementary Table 2: Expected success test cases.**

| Test case name                                                                           | Description                                      |
|------------------------------------------------------------------------------------------|--------------------------------------------------|
| Field 10: blockCount: number of blocks in the feature.                                   |                                                  |
| 10-different_blockcounts                                                                 | Features have different numbers of blocks        |
| 10-leading_zero_blockcount                                                               | blockCount left-padded with "0"                  |
| 10-max_blocks                                                                            | Maximum number of blocks possible for its length |
| 10-one_block                                                                             | All features have only one block                 |
| Field 11: blockSizes: list of length blockCount containing the size of each block.       |                                                  |
| 11-leading_zero_blocksize                                                                | blockSizes list has a size left-padded with "0"  |
| 11-length_one_block                                                                      | All blocks have a size of 1                      |
| 11-trailing_commas                                                                       | blockSizes list with a trailing comma            |
| Field 12: blockStarts: list of length blockCount containing each block's start position. |                                                  |
| 12-no_gap_blocks                                                                         | No gaps between blocks                           |
| Other: unrelated to individual BED fields.                                               |                                                  |
| other-comment_end                                                                        | Comment line at the end of the file              |
| other-comment_middle                                                                     | Comment line in the middle of the file           |
| other-comment_start                                                                      | Comment line at the start of the file            |
| other-fully_space_delimited                                                              | Fields all space-delimited                       |
| other-multiple_comments                                                                  | Many comments in various positions in the file   |
| other-not_tab_delimited                                                                  | File contains both space and tab delimiters      |
| other-space_after_tab                                                                    | Extra space after a tab delimiter                |
| other-space_before_tab                                                                   | Extra space before a tab delimiter               |
| other-space_between_lines                                                                | Empty line between features                      |

**Supplementary Table 2: Expected success test cases.** (Continued)

| Test case name                                                           | Description                          |
|--------------------------------------------------------------------------|--------------------------------------|
| Field 1: chrom: the name of the chromosome where the feature is present. |                                      |
| 01-missing_chrom                                                         | chrom is "."                         |
| 01-no_chrom                                                              | Missing chrom                        |
| 01-special_char_chrom                                                    | chrom has non-alphanumeric character |
| 01-quote_chrom                                                           | chrom enclosed with quotation marks  |
| Field 2: chromStart: start position of the feature on the chromosome.    |                                      |
| 02-float_start                                                           | chromStart is floating-point number  |
| 02-no_start                                                              | Missing chromStart                   |
| 02-start_negative                                                        | chromStart is negative               |
| 02-string_start                                                          | chromStart is not numeric            |

**Supplementary Table 3: Expected fail test cases.**

| <b>Test case name</b>                                                                                     | <b>Description</b>                                         |
|-----------------------------------------------------------------------------------------------------------|------------------------------------------------------------|
| <b>Field 3: chromEnd: end position of the feature on the chromosome.</b>                                  |                                                            |
| 03-chromEnd_too_large                                                                                     | chromEnd exceeds maximum size of an unsigned integer       |
| 03-end_negative                                                                                           | chromEnd is negative                                       |
| 03-float_end                                                                                              | chromEnd is floating-point number                          |
| 03-no_end                                                                                                 | Missing chromEnd                                           |
| 03-start_gt_end                                                                                           | chromStart greater than chromEnd                           |
| 03-string_end                                                                                             | chromEnd is not numeric                                    |
| <b>Field 4: name: string that describes the feature.</b>                                                  |                                                            |
| 04-mixed_bed_types                                                                                        | Features have a different number of fields                 |
| 04-name_with_spaces                                                                                       | Name has a space                                           |
| 04-no_name                                                                                                | Missing name                                               |
| <b>Field 5: score: integer between 0 and 1000, inclusive.</b>                                             |                                                            |
| 05-float_score                                                                                            | Score is floating-point number                             |
| 05-no_score                                                                                               | Missing score                                              |
| 05-score_gt_1000                                                                                          | Score greater than 1000                                    |
| 05-score_lt_0                                                                                             | Score less than 0                                          |
| 05-string_score                                                                                           | Score is not numeric                                       |
| <b>Field 6: strand: strand that the feature appears on.</b>                                               |                                                            |
| 06-invalid_strand                                                                                         | Strand not one of "+", "-", or "."                         |
| 06-no_strand                                                                                              | Missing strand                                             |
| <b>Field 7: thickStart: start position at which the feature is visualized with thicker display.</b>       |                                                            |
| 07-float_thickStart                                                                                       | thickStart is floating-point number                        |
| 07-no_thickStart                                                                                          | Missing thickStart                                         |
| 07-string_thickStart                                                                                      | thickStart is not numeric                                  |
| 07-thickStart_lt_chromStart                                                                               | thickStart less than chromStart                            |
| <b>Field 8: thickEnd: end position at which the feature is visualized with thicker display.</b>           |                                                            |
| 08-float_thickEnd                                                                                         | thickEnd is floating-point number                          |
| 08-string_thickEnd                                                                                        | thickEnd is not numeric                                    |
| 08-thickEnd_gt_chromEnd                                                                                   | thickEnd greater than chromEnd                             |
| 08-thickStart_gt_thickEnd                                                                                 | thickStart greater than thickEnd                           |
| 08-thickStartEnd_wide                                                                                     | Thick interval not contained within [chromStart, chromEnd) |
| <b>Field 9: itemRgb: A triplet of integers that determines the color of this feature when visualized.</b> |                                                            |
| 09-incomplete_rgb                                                                                         | RGB value not a triplet or "0"                             |
| 09-no_rgb                                                                                                 | Missing itemRgb                                            |
| 09-string_rgb                                                                                             | itemRgb contains alphabetical characters                   |

**Supplementary Table 3: Expected fail test cases.** (Continued)

| <b>Test case name</b>                                                                           | <b>Description</b>                                        |
|-------------------------------------------------------------------------------------------------|-----------------------------------------------------------|
| <b>Field 10: blockCount: number of blocks in the feature.</b>                                   |                                                           |
| 10-blockCount_negative                                                                          | blockCount is negative                                    |
| 10-blockCount_string                                                                            | blockCount is non-numeric                                 |
| 10-blockCount_zero                                                                              | blockCount is "0"                                         |
| 10-no_blockCount                                                                                | Missing blockCount                                        |
| <b>Field 11: blockSizes: list of length blockCount containing the size of each block.</b>       |                                                           |
| 11-block_outofrange                                                                             | Block located outside the interval chromStart to chromEnd |
| 11-blocksizes_missing_comma                                                                     | blockSizes list missing comma separators                  |
| 11-mismatch_count_long                                                                          | blockSizes list longer than blockCount                    |
| 11-mismatch_count_short                                                                         | blockSizes list shorter than blockCount                   |
| 11-size_negative                                                                                | Block has negative size                                   |
| <b>Field 12: blockStarts: list of length blockCount containing each block's start position.</b> |                                                           |
| 12-bed13                                                                                        | Feature has 13 fields                                     |
| 12-overlapping_blocks                                                                           | Blocks overlap each other                                 |
| 12-start_outofrange                                                                             | Block start position past chromEnd                        |
| 12-unsorted_block_starts                                                                        | blockStarts list not sorted                               |
| <b>Other: unrelated to individual BED fields.</b>                                               |                                                           |
| other-quote_chrom                                                                               | Feature enclosed in quotation marks                       |

**Supplementary Table 3: Expected fail test cases.** (Continued)
